# Supplementary material for: Long-Term Clinical Safety of the Ad26.ZEBOV and MVA-BN-Filo Ebola Vaccines: A Prospective, Multi-Country, Observational Study
Source: MDPI journal article supplement (doi:10.3390/vaccines12020210), 2024-02-17
Supplement: s1 [file s1]

## **Supplementary Material**

### **EBL4001 principal investigators**

#### *Burkina Faso*

Houreratou Barry, Sodiomon Bienvenu Sirima

#### *France*

Louis Bernard, Elisabeth Botelho-Nevers, Fabrice Lainé, Odile Launay, Jean-Daniel Lelièvre,  
Jean-François Nicolas, Catherine Schmidt-Mutter

#### *Kenya*

Omu Anzala

#### *Tanzania*

George PrayGod

#### *Uganda*

Pontiano Kaleebu, Hannah Kibuuka

#### *United Kingdom*

Adeep Puri, Mathew D. Snape

#### *United States*

Stephen Bart

## **EBL4001 study team members**

### *Burkina Faso*

Houreratou Barry, Noélié Bere Henry, Edith Christiane Bougouma, Sam Aboubacar Coulibaly, Amidou Diarra, Jean Bernard Gbangou, Désiré Kargougou, Issa Nebie, Daouda Ouattara, Alphonse Ouedraogo, Amidou Z. Ouedraogo, Hadiza Savadogo, Sodiomon Bienvenu Sirima, Alfred Bewentore Tiono, Jean Baptiste Yaro

### *France*

Alexandre Bolle, Thouma-La Chanthavinout, Fabrice Lainé, Jean-Daniel Lelièvre, Jean-François Nicolas, Catherine Schmidt-Mutter

### *Tanzania*

George PrayGod, Beatrice Kamala

### *Tanzania and United Kingdom*

Deborah Watson-Jones, Hilary Whitworth

### *Uganda*

Hannah Kibuuka, Maureen Mukyala, Betty Mwesigwa, Immaculate Nakabuye, Jacqueline Namugabo, Joanita Namuli, Andrew Ssenyonga, Nicholas Tamale, Allan Tindikahwa

### *United Kingdom*

Daniela Manno, Philomena Mweu, Andrew J. Pollard, Adeep Puri, Mathew D. Snape

Janssen

Macaya Douoguih, Auguste Gaddah, Michael Katwere, Babajide Keshinro, Kerstin Luhn,  
Cynthia Robinson, Georgi Shukarev, Gunasekaran Subramaniam, Wim Van Dijck

**Figure S1. Height/length growth percentiles by visit for each participant in Cohort 3 (FAS).**

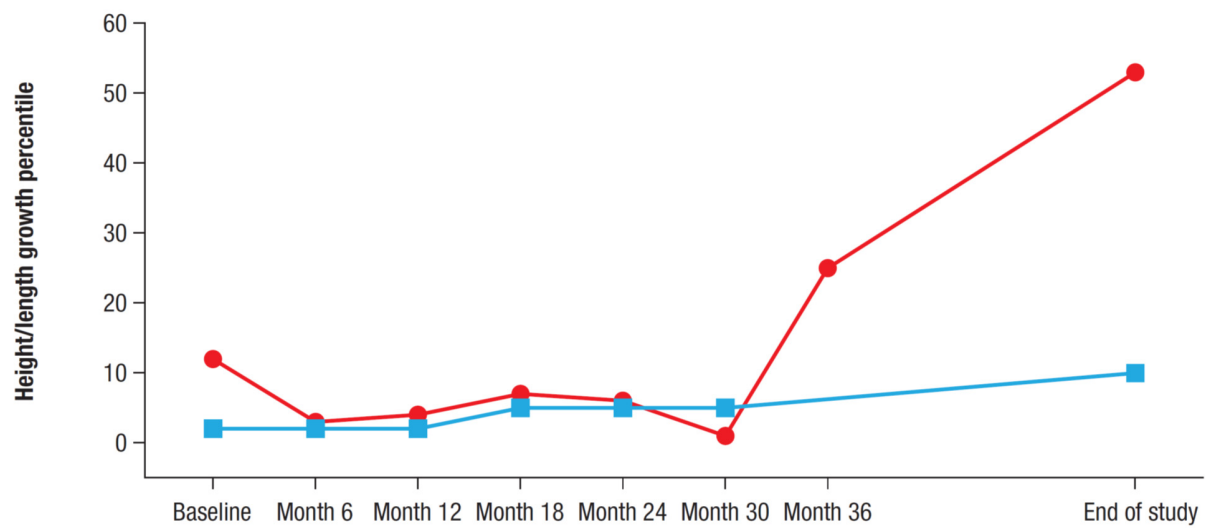

FAS, full analysis set.
